# Supplementary material for: Global Trends in ADHD Medication Use: Multiple Contexts and Rising Concerns—A Narrative Review
Source: MDPI journal article supplement (doi:10.3390/jcm14207338), 2025-10-17
Supplement: s1 [file jcm-3899189-supplementary.pdf › jcm-3899189-supplementary.pdf]

Supplementary table S1. Overview of included studies with details on the operationalization of ADHD medication use prevalence and data quality assessment

| Study                                                                                                                                                                     | Years covered | Data source                                                                             | Type of source                                         | Numerator (counted for prevalence of ADHD medication use)           | Denominator (counted for prevalence of ADHD medication use)                                                 | Author-applied adjustments   | Data quality |
|---------------------------------------------------------------------------------------------------------------------------------------------------------------------------|---------------|-----------------------------------------------------------------------------------------|--------------------------------------------------------|---------------------------------------------------------------------|-------------------------------------------------------------------------------------------------------------|------------------------------|--------------|
| Lopez-Leon, Sandra et al. Psychotropic medication in children and adolescents in the United States in the year 2004 vs 2014. [1]                                          | 2004 and 2014 | MarketScan Commercial Claims and Medicare database and the MarketScan Medicaid database | Administrative claims database (commercial and public) | the number of children with $\geq 1$ prescription                   | the total number of children in the database                                                                | Conversion to rates per 1000 | Moderate     |
| Zuvekas SH, Vitiello B. Stimulant medication use in children: a 12-year perspective. [2]                                                                                  | 1996-2008     | The Medical Expenditure Panel Survey (MEPS)                                             | a survey                                               | the number of children $<19$ with $\geq 1$ stimulant prescription   | all children $<19$ in MEPS sample, weighted to represent the US civilian non-institutionalized population   | Conversion to rates per 1000 | Low          |
| Zuvekas SH, Vitiello B, Norquist GS. Recent trends in stimulant medication use among U.S. children. [3]                                                                   | 1997-2002     | The Medical Expenditure Panel Survey (MEPS)                                             | a survey                                               | the number of children $<19$ with $\geq 1$ stimulant prescription   | all children $<19$ in MEPS sample, weighted to represent the US civilian non-institutionalized population   | Conversion to rates per 1000 | Low          |
| Moore TJ, Wirtz PW, Kruszewski SP, Alexander GC. Changes in medical use of central nervous system stimulants among US adults, 2013 and 2018: a cross-sectional study. [4] | 2013 and 2018 | The Medical Expenditure Panel Survey (MEPS)                                             | a survey                                               | the number of adults $\geq 19$ with $\geq 1$ stimulant prescription | all adults $\geq 19$ in MEPS sample, weighted to represent the US civilian non-institutionalized population | Conversion to rates per 1000 | Low          |

|                                                                                                                                                                                                                                       |               |                                                                                                       |                                                                                                                          |                                                                                             |                                                                                                                                                                                               |                              |          |
|---------------------------------------------------------------------------------------------------------------------------------------------------------------------------------------------------------------------------------------|---------------|-------------------------------------------------------------------------------------------------------|--------------------------------------------------------------------------------------------------------------------------|---------------------------------------------------------------------------------------------|-----------------------------------------------------------------------------------------------------------------------------------------------------------------------------------------------|------------------------------|----------|
| Cox ER, Halloran DR, Homan SM, Welliver S, Mager DE. Trends in the prevalence of chronic medication use in children: 2002-2005. [5]                                                                                                   | 2002 and 2005 | Express Scripts, Inc.                                                                                 | Administrative claims database (commercial)                                                                              | the number of children (5–19) with $\geq 1$ prescription                                    | average number of enrolled children in the same quarter                                                                                                                                       | none                         | Moderate |
| Danielson ML, Bohm MK, Newsome K, et al. Trends in Stimulant Prescription Fills Among Commercially Insured Children and Adults — United States, 2016–2021. MMWR Morb Mortal Wkly Rep 2023;72:327–332. [6]                             | 2016–2021     | The Merative MarketScan Commercial Database                                                           | Administrative claims database (commercial)                                                                              | the number of persons with $\geq 1$ prescription stimulant fill during the year             | Enrollees aged 5–64 years, continuously enrolled throughout the calendar year.                                                                                                                | Conversion to rates per 1000 | Moderate |
| Raman, S. R., Man, K. K. C., Bahmanyar, S., Berard, A., Bilder, S., Boukhris, T., et al. Trends in attention-deficit hyperactivity disorder medication use: a retrospective observational study using population-based databases. [7] | 2001 - 2015   | Multiple national prescription registries and claims databases, as reported in Raman et al., 2018 [7] | Primary care EHR databases, administrative claims databases, and national prescription registries (multi-country study). | the annual prevalence of each medication was expressed as a percentage, per 100 individuals | As defined in each national dataset (e.g., total population of children/adolescents or adults, depending on the country). For details, see original study table in in Raman et al., 2018 [7]. | Conversion to rates per 1000 | Moderate |

|                                                                                                                                                                                                                                                   |           |                                                                                                                                                                       |                                                                                                                                                                                                                                                 |                                                                                      |                                                                                                                                    |                              |          |
|---------------------------------------------------------------------------------------------------------------------------------------------------------------------------------------------------------------------------------------------------|-----------|-----------------------------------------------------------------------------------------------------------------------------------------------------------------------|-------------------------------------------------------------------------------------------------------------------------------------------------------------------------------------------------------------------------------------------------|--------------------------------------------------------------------------------------|------------------------------------------------------------------------------------------------------------------------------------|------------------------------|----------|
| Bachmann CJ, Wijlaars LP, Kalverdijk LJ, Burcu M, Glaeske G, Schuiling-Veninga CCM, Hoffmann F, Aagaard L, Zito JM. Trends in ADHD medication use in children and adolescents in five western countries, 2005-2012. [8]                           | 2005-2012 | This multinational study used national or regional administrative and prescription databases                                                                          | Administrative and prescription databases (Denmark: national prescription registry; Germany: statutory health insurance claims; Netherlands: community pharmacy dispensing; UK: primary care prescribing database; USA: public insurance claims | the number of children and adolescents (0–19 years) with one or more dispensing      | Difficult to determine from the available description                                                                              | Conversion to rates per 1000 | Moderate |
| Hartz I, Madsstuen NHH, Andersen PN, Handal M, Odsbu I. Nationwide trends in the use of ADHD medications in the period 2006-2022: a study from the Norwegian prescription database. [9]                                                           | 2006-2022 | the Norwegian Prescription Database (NorPD)                                                                                                                           | National prescription registry                                                                                                                                                                                                                  | the number of individuals with $\geq 1$ dispensed ADHD medication in a calendar year | All residents of Norway aged 6–64 years with a valid personal identification number, counted as of January 1 each year (2006–2022) | none                         | High     |
| Furu K, Karlstad Ø, Zoega H, Martikainen JE, Bahmanyar S, Kieler H, Pottegård A. Utilization of Stimulants and Atomoxetine for Attention-Deficit/Hyperactivity Disorder among 5.4 Million Children Using Population-Based Longitudinal Data. [10] | 2008-2012 | Norwegian Prescription Database, Danish National Prescription Registry, Swedish Prescribed Drug Register, Finnish Prescription Register, Icelandic Medicines Registry | National prescription registry                                                                                                                                                                                                                  | the number of children with $\geq 1$ dispensed ADHD drug in a calendar year          | Number of children (0–17 years) in each country at the beginning of each calendar year                                             | none                         | High     |

|                                                                                                                                                                                                                                     |           |                                                                                                                                                                       |                                |                                                                                         |                                                                                                                                               |      |      |
|-------------------------------------------------------------------------------------------------------------------------------------------------------------------------------------------------------------------------------------|-----------|-----------------------------------------------------------------------------------------------------------------------------------------------------------------------|--------------------------------|-----------------------------------------------------------------------------------------|-----------------------------------------------------------------------------------------------------------------------------------------------|------|------|
| Karlstad Ø, Zoëga H, Furu K, Bahmanyar S, Martikainen JE, Kieler H, Pottegård A. Use of drugs for ADHD among adults-a multinational study among 15.8 million adults in the Nordic countries. [11]                                   | 2008-2012 | Norwegian Prescription Database, Danish National Prescription Registry, Swedish Prescribed Drug Register, Finnish Prescription Register, Icelandic Medicines Registry | National prescription registry | the number of individuals aged 18–64 with ≥1 dispensed ADHD drug in a calendar year     | Gender- and age-specific population aged 18–64 years in each country, retrieved from national population registers (as of each calendar year) | none | High |
| Sørensen AMS, Wesselhöeft R, Andersen JH, Reutfors J, Cesta CE, Furu K, Hartz I, Rasmussen L. Trends in use of attention deficit hyperactivity disorder medication among children and adolescents in Scandinavia in 2010-2020. [12] | 2010-2020 | Norwegian Prescription Database, Danish National Prescription Registry, Swedish Prescribed Drug Register                                                              | National prescription registry | the number of individuals aged 5–19 with ≥1 dispensed ADHD medication during the year   | The number of individuals aged 5–19 years in each country per year by January 1st                                                             | none | High |
| Hartz I, Skurtveit S, Steffenak AK, Karlstad O, Handal M. Psychotropic drug use among 0-17 year olds during 2004-2014: a nationwide prescription database study. [13]                                                               | 2004-2014 | Norwegian Prescription Database                                                                                                                                       | National prescription registry | the number of individuals <18 years with ≥1 dispensed psychotropic drug during the year | All inhabitants <18 years in Norway as of July 1 each year                                                                                    | none | High |
| Lillemoen PK, Kjosavik SR, Hunskaar S, Ruths S. Prescriptions for ADHD medication, 2004-08. [14]                                                                                                                                    | 2004-2008 | Norwegian Prescription Database                                                                                                                                       | National prescription registry | the number of individuals who collected ≥1 ADHD medication prescription in a year       | Total number of inhabitants in Norway                                                                                                         | none | High |

|                                                                                                                                                                                          |           |                                                     |                                                                                   |                                                                                                               |                                                                                                                                                  |      |          |
|------------------------------------------------------------------------------------------------------------------------------------------------------------------------------------------|-----------|-----------------------------------------------------|-----------------------------------------------------------------------------------|---------------------------------------------------------------------------------------------------------------|--------------------------------------------------------------------------------------------------------------------------------------------------|------|----------|
| Hodgkins P, Sasané R, Meijer WM. Pharmacologic treatment of attention-deficit/hyperactivity disorder in children: incidence, prevalence, and treatment patterns in the Netherlands. [15] | 2000-2007 | PHARMO Record Linkage System                        | Population-based integrated medical record and pharmacy database                  | the number of children (6–17 y) with $\geq 1$ dispensed ADHD medication during a given year                   | total population aged 6–17 that year                                                                                                             | none | Moderate |
| Ringeling, L.T., Srivastava, A., Gangapersad, R.N. <i>et al.</i> ADHD medication dispensing trends in Dutch youth before and after the implementation of the Youth Act. [16]             | 2010-2022 | InterAction Database (IADB)                         | Community pharmacy dispensing database (population-based administrative database) | the number of users                                                                                           | total underlying population present in the IADB database                                                                                         | none | Moderat  |
| Trip AM, Visser ST, Kalverdijs LJ, de Jong-van den Berg LT. Large increase of the use of psycho-stimulants among youth in the Netherlands between 1996 and 2006. [17]                    | 1996-2006 | InterAction Database (IADB)                         | Community pharmacy dispensing database (population-based administrative database) | the number of children/adolescents (0–19 y) with $\geq 1$ psychostimulant prescription in a calendar year     | All children and adolescents aged 0–19 years included in the IADB.nl database for each calendar year between 1996 and 2006                       | none | Moderate |
| Kraut AA, Langner I, Lindemann C, Banaschewski T, Petermann U, Petermann F, Mikolajczyk RT, Garbe E. Comorbidities in ADHD children treated with methylphenidate: a database study. [18] | 2004-2006 | Data from four statutory health insurance companies | Administrative claims database (public, multi-payer system)                       | the number of insured persons aged 3–17 with $\geq 1$ filled methylphenidate prescription during a study year | All insurees aged 3–17 years with valid data on birth year, sex, and residence in Germany, insured at least one day in the respective study year | none | Moderate |

|                                                                                                                                                                                         |           |                                                       |                                                               |                                                                                                                                              |                                                                                                           |                              |          |
|-----------------------------------------------------------------------------------------------------------------------------------------------------------------------------------------|-----------|-------------------------------------------------------|---------------------------------------------------------------|----------------------------------------------------------------------------------------------------------------------------------------------|-----------------------------------------------------------------------------------------------------------|------------------------------|----------|
| Abbas S, Ihle P, Adler JB, Engel S, Günster C, Linder R, Lehmkuhl G, Schübert I. Psychopharmacological Prescriptions in Children and Adolescents in Germany. [19]                       | 2004–2012 | Data from two statutory health insurance companies    | Administrative claims database (public, multi-payer system)   | the number of continuously insured children and adolescents with at least one prescription for a psychotropic medication within a given year | continuously insured children and adolescents in the relevant year                                        | Conversion to rates per 1000 | Moderate |
| Ehrhardt C, Boucherie Q, Pauly V, Braunstein D, Ronflé E, Thirion X, Frauger E, Micallef J. Methylphenidate: Gender trends in adult and pediatric populations over a 7year period. [20] | 2005-2011 | French general health insurance system (FGHIS)        | Administrative claims database (public, multi-payer system)   | the number of patients with at least one methylphenidate dispensing during the calendar year                                                 | All individuals covered by the French General Health Insurance System (FGHIS) in the two included regions | none                         | Moderate |
| Fond G, Pauly V, Brousse Y, et al. Mental Health Care Utilization and Prescription Rates Among Children, Adolescents, and Young Adults in France. [21]                                  | 2016-2023 | French National Health Insurance Database (SNDS)      | National health insurance claims database                     | individuals aged 0–25 years with ≥1 dispensing of a psychotropic medication per year                                                         | total population aged 0–25 years in France                                                                | none                         | Moderate |
| Stuhec, M., Locatelli, I. Attention deficit hyperactivity disorder pharmacotherapy in Slovenian adults: a population-based study. [22]                                                  | 2003–2015 | Health Insurance Institute of Slovenia (NHI) database | Administrative claims database (public, single -payer system) | the number of adults with at least one prescription for ADHD medication in a given year                                                      | Adult population (≥18 years) of Slovenia by age group                                                     | Conversion to rates per 1000 | Moderate |
| Stuhec M, Locatelli I. Age-related pharmacotherapy of attention deficit hyperactivity disorder in Slovenia in children and                                                              | 2003-2015 | Health Insurance Institute of Slovenia (NHI) database | Administrative claims database (public, single -payer system) | the number of children and adolescents (<18 years) who were prescribed at least one ADHD drug in a given calendar year                       | the total number of children and adolescents in the population for that year                              | none                         | Moderate |

|                                                                                                                                                                                                                              |           |                                                                        |                                                             |                                                                                                                                    |                                                                                      |                              |          |
|------------------------------------------------------------------------------------------------------------------------------------------------------------------------------------------------------------------------------|-----------|------------------------------------------------------------------------|-------------------------------------------------------------|------------------------------------------------------------------------------------------------------------------------------------|--------------------------------------------------------------------------------------|------------------------------|----------|
| adolescents: A population-based study. [23]                                                                                                                                                                                  |           |                                                                        |                                                             |                                                                                                                                    |                                                                                      |                              |          |
| Boland F, Galvin R, Reulbach U, Motterlini N, Kelly D, Bennett K, Fahey T. Psychostimulant prescribing trends in a paediatric population in Ireland: a national cohort study. [24]                                           | 2002-2011 | GMS (General Medical Services) pharmacy claims database (income-based) | Administrative claims database (public, multi-payer system) | the number of children with $\geq 1$ dispensed psychostimulant prescription per year                                               | Children aged 0–15 years covered by the GMS scheme                                   | none                         | Moderate |
| Beau-Lejdstrom R, Douglas I, Evans SJ, Smeeth L. Latest trends in ADHD drug prescribing patterns in children in the UK: prevalence, incidence and persistence. [25]                                                          | 1992-2013 | CPRD (Clinical Practice Research Datalink)                             | Electronic medical records – GP prescribing data            | the number of children aged under 16 years who received at least one prescription for an ADHD drug during a given calendar year    | the mid-year number of children under 16 registered in the CPRD that year, per 1,000 | none                         | Moderate |
| McCarthy S, Wilton L, Murray ML, Hodgkins P, Asherson P, Wong IC. The epidemiology of pharmacologically treated attention deficit hyperactivity disorder (ADHD) in children, adolescents and adults in UK primary care. [26] | 2003-2008 | The Health Improvement Network (THIN)                                  | Electronic medical records — GP prescribing data            | the number of patients with both a diagnosis of ADHD and at least one prescription for ADH medication within a given calendar year | the total mid-year source population in that year, per 1,000 individuals             | none                         | Moderate |
| McKechne DGJ, O'Nions E, Dunsmuir S, Petersen I. Attention-deficit hyperactivity disorder diagnoses and prescriptions in UK primary care, 2000-                                                                              | 2000-2018 | IQVIA Medical Research Data (incorporating data from THIN)             | Electronic medical records — GP prescribing data            | the number of individuals with $\geq 2$ prescriptions for ADHD medication within one year                                          | the total number of individuals in the eligible cohort                               | Conversion to rates per 1000 | Moderate |

|                                                                                                                                                                                                     |           |                                                              |                                                                                                         |                                                                                                           |                                                                                                                              |                              |          |
|-----------------------------------------------------------------------------------------------------------------------------------------------------------------------------------------------------|-----------|--------------------------------------------------------------|---------------------------------------------------------------------------------------------------------|-----------------------------------------------------------------------------------------------------------|------------------------------------------------------------------------------------------------------------------------------|------------------------------|----------|
| 2018: population-based cohort study. [27]                                                                                                                                                           |           |                                                              |                                                                                                         |                                                                                                           |                                                                                                                              |                              |          |
| Butt DA, Stephenson E, Kalia S, Moineddin R, Tu K. Patient visits and prescriptions for attention-deficit/hyperactivity disorder from 2017-2021: Impacts of COVID-19 pandemic in primary care. [28] | 2017-2021 | UTOPIAN Data Safe Haven                                      | Primary care electronic medical record                                                                  | the number of patients with $\geq 1$ prescription for ADHD medication during the calendar year            | All eligible patients aged 5–55 years registered in UTOPIAN practices in a given calendar year who met inclusion criteria    | none                         | Moderate |
| Morkem R, Patten S, Queenan J, Barber D. Recent Trends in the Prescribing of ADHD Medications in Canadian Primary Care. [29]                                                                        | 2005-2015 | Canadian Primary Care Sentinel Surveillance Network (CPCSSN) | Primary care electronic medical record                                                                  | the number of patients prescribed with $\geq 1$ prescription for ADHD medication during the calendar year | the total number of patients with $\geq 1$ primary care encounter in the same year, per 100                                  | Conversion to rates per 1000 | Moderate |
| Brett J, Karanges EA, Daniels B, et al. Psychotropic medication use in Australia, 2007 to 2015: Changes in annual incidence, prevalence and treatment exposure. [30]                                | 2006-2015 | Pharmaceutical Benefits Scheme (PBS)                         | Administrative claims database of subsidized outpatient prescriptions dispensed at community pharmacies | the number of individuals with $\geq 1$ dispensing of ADHD medication in a calendar year                  | Adults aged $\geq 18$ years who were long-term concessional beneficiaries continuously eligible for PBS-subsidized medicines | none                         | High     |
| Song I, Lee MS, Lee E-K, Shin J-Y. Patient and provider characteristics related with prescribing of ADHD medication: Nationwide health insurance claims database study in Korea. [31]               | 2007-2011 | Korea Health Insurance Review and Assessment Service (HIRA)  | National administrative claims database (universal, single-payer system)                                | the number of patients $< 18$ years with $\geq 1$ prescription in a given year                            | All individuals aged $< 18$ years in Korea                                                                                   | none                         | High     |



|                                                                                                                                                     |           |                                 |                                                                                                                          |                                                                                          |                                                                                                      |                              |          |
|-----------------------------------------------------------------------------------------------------------------------------------------------------|-----------|---------------------------------|--------------------------------------------------------------------------------------------------------------------------|------------------------------------------------------------------------------------------|------------------------------------------------------------------------------------------------------|------------------------------|----------|
| Hoshen MB, Benis A, Keyes KM, Zoëga H. Stimulant use for ADHD and relative age in class among children in Israel. [32]                              | 2006-2011 | Clalit Health Services database | Administrative health insurance claims database (large nonprofit insurer, part of Israel's universal multi-payer system) | the number of children who filled $\geq 1$ prescription in a given calendar year         | All children aged 6–17 years with at least one full year of continuous Clalit insurance coverage     | Conversion to rates per 1000 | Moderate |
| The Swedish Prescribed Drug Registry. [33]                                                                                                          | 2006-2024 | -                               | National prescription registry                                                                                           | the number of patients with $\geq 1$ dispensed ADHD drug in a calendar year              | The number of individuals in each country per year by January 1st                                    | none                         | High     |
| Norhealth ( <a href="http://www.norgesghelsa.no">www.norgesghelsa.no</a> , accessed on 14 July 2025) [34], The Norwegian Prescription Database [35] | 2004-2021 | -                               | National prescription registry                                                                                           | the number of patients with $\geq 1$ dispensed ADHD drug in a calendar year              | The number of individuals in each country per year by January 1st                                    | none                         | High     |
| The Danish Health Data Authority, medstat.dk and date. [36]                                                                                         | 1999-2024 | -                               | National prescription registry                                                                                           | the number of patients with $\geq 1$ dispensed ADHD drug in a calendar year              | The number of individuals in each country per year by January 1st                                    | none                         | High     |
| The Icelandic Pharmaceutical Database [37]                                                                                                          | 2005-2024 | -                               | National prescription registry                                                                                           | the number of patients with $\geq 1$ dispensed ADHD drug in a calendar year              | The number of individuals in each country per year by January 1st                                    | none                         | High     |
| The Australian Institute of Health and Welfare (AIHW) (2025) ADHD medications dispensed 2004–05 to 2023–24 [38]                                     | 2004-2024 | Pharmaceutical Benefits Scheme  | Administrative claims database of subsidized outpatient prescriptions dispensed at community pharmacies                  | the number of individuals with $\geq 1$ dispensing of ADHD medication in a calendar year | All who were long-term concessional beneficiaries continuously eligible for PBS-subsidized medicines | none                         | High     |

## References

1. Lopez-Leon, S.; Lopez-Gomez, M.I.; Warner, B.; Ruiter-Lopez, L. Psychotropic medication in children and adolescents in the United States in the year 2004 vs 2014. *Daru* **2018**, *26*, 5-10, doi:10.1007/s40199-018-0204-6.
2. Zuvekas, S.H.; Vitiello, B. Stimulant medication use in children: a 12-year perspective. *Am J Psychiatry* **2012**, *169*, 160-166, doi:10.1176/appi.ajp.2011.11030387.
3. Zuvekas, S.H.; Vitiello, B.; Norquist, G.S. Recent trends in stimulant medication use among U.S. children. *Am J Psychiatry* **2006**, *163*, 579-585, doi:10.1176/ajp.2006.163.4.579.
4. Moore, T.J.; Wirtz, P.W.; Kruszewski, S.P.; Alexander, G.C. Changes in medical use of central nervous system stimulants among US adults, 2013 and 2018: a cross-sectional study. *BMJ Open* **2021**, *11*, e048528, doi:10.1136/bmjopen-2020-048528.
5. Cox, E.R.; Halloran, D.R.; Homan, S.M.; Welliver, S.; Mager, D.E. Trends in the prevalence of chronic medication use in children: 2002-2005. *Pediatrics* **2008**, *122*, e1053-1061, doi:10.1542/peds.2008-0214.
6. Danielson, M.L.; Bohm, M.K.; Newsome, K.; Claussen, A.H.; Kaminski, J.W.; Grosse, S.D.; Siwakoti, L.; Arifkhanova, A.; Bitsko, R.H.; Robinson, L.R. Trends in Stimulant Prescription Fills Among Commercially Insured Children and Adults - United States, 2016-2021. *MMWR Morb Mortal Wkly Rep* **2023**, *72*, 327-332, doi:10.15585/mmwr.mm7213a1.
7. Raman, S.R.; Man, K.K.C.; Bahmanyar, S.; Berard, A.; Bilder, S.; Boukhris, T.; Bushnell, G.; Crystal, S.; Furu, K.; KaoYang, Y.H.; et al. Trends in attention-deficit hyperactivity disorder medication use: a retrospective observational study using population-based databases. *Lancet Psychiatry* **2018**, *5*, 824-835, doi:10.1016/S2215-0366(18)30293-1.
8. Bachmann, C.J.; Wijlaars, L.P.; Kalverdijk, L.J.; Burcu, M.; Glaeske, G.; Schuiling-Veninga, C.C.M.; Hoffmann, F.; Aagaard, L.; Zito, J.M. Trends in ADHD medication use in children and adolescents in five western countries, 2005-2012. *Eur Neuropsychopharmacol* **2017**, *27*, 484-493, doi:10.1016/j.euroneuro.2017.03.002.
9. Hartz, I.; Madsstuen, N.H.H.; Andersen, P.N.; Handal, M.; Odsbu, I. Nationwide trends in the use of ADHD medications in the period 2006-2022: a study from the Norwegian prescription database. *BMC Psychiatry* **2024**, *24*, 767, doi:10.1186/s12888-024-06199-9.
10. Furu, K.; Karlstad, O.; Zoega, H.; Martikainen, J.E.; Bahmanyar, S.; Kieler, H.; Pottegard, A. Utilization of Stimulants and Atomoxetine for Attention-Deficit/Hyperactivity Disorder among 5.4 Million Children Using Population-Based Longitudinal Data. *Basic Clin Pharmacol Toxicol* **2017**, *120*, 373-379, doi:10.1111/bcpt.12724.
11. Karlstad, O.; Zoega, H.; Furu, K.; Bahmanyar, S.; Martikainen, J.E.; Kieler, H.; Pottegard, A. Use of drugs for ADHD among adults-a multinational study among 15.8 million adults in the Nordic countries. *Eur J Clin Pharmacol* **2016**, *72*, 1507-1514, doi:10.1007/s00228-016-2125-y.
12. Sorensen, A.M.S.; Wesselhoeft, R.; Andersen, J.H.; Reutfors, J.; Cesta, C.E.; Furu, K.; Hartz, I.; Rasmussen, L. Trends in use of attention deficit hyperactivity disorder medication among children and adolescents in Scandinavia in 2010-2020. *Eur Child Adolesc Psychiatry* **2023**, *32*, 2049-2056, doi:10.1007/s00787-022-02034-2.
13. Hartz, I.; Skurtveit, S.; Steffenak, A.K.; Karlstad, O.; Handal, M. Psychotropic drug use among 0-17 year olds during 2004-2014: a nationwide prescription database study. *BMC Psychiatry* **2016**, *16*, 12, doi:10.1186/s12888-016-0716-x.
14. Lillemoen, P.K.; Kjosavik, S.R.; Hunskar, S.; Ruths, S. Prescriptions for ADHD medication, 2004-08. *Tidsskr Nor Laegeforen* **2012**, *132*, 1856-1860, doi:10.4045/tidsskr.11.1270.
15. Hodgkins, P.; Sasane, R.; Meijer, W.M. Pharmacologic treatment of attention-deficit/hyperactivity disorder in children: incidence, prevalence, and treatment patterns in the Netherlands. *Clin Ther* **2011**, *33*, 188-203, doi:10.1016/j.clinthera.2011.03.001.

16. Ringeling, L.T.; Srivastava, A.; Gangapersad, R.N.; Bos, J.H.J.; de Winter, B.C.M.; Hak, E.; Hillegers, M.H.J.; Koch, B.C.P.; Schuiling-Veninga, C.C.M.; Dierckx, B. ADHD medication dispensing trends in Dutch youth before and after the implementation of the Youth Act (2010-2022). *Eur Child Adolesc Psychiatry* **2025**, doi:10.1007/s00787-025-02791-w.
17. Trip, A.M.; Visser, S.T.; Kalverdiijk, L.J.; de Jong-van den Berg, L.T. Large increase of the use of psycho-stimulants among youth in the Netherlands between 1996 and 2006. *Br J Clin Pharmacol* **2009**, *67*, 466-468, doi:10.1111/j.1365-2125.2009.03373.x.
18. Kraut, A.A.; Langner, I.; Lindemann, C.; Banaschewski, T.; Petermann, U.; Petermann, F.; Mikolajczyk, R.T.; Garbe, E. Comorbidities in ADHD children treated with methylphenidate: a database study. *BMC Psychiatry* **2013**, *13*, 11, doi:10.1186/1471-244X-13-11.
19. Abbas, S.; Ihle, P.; Adler, J.B.; Engel, S.; Gunster, C.; Linder, R.; Lehmkuhl, G.; Schubert, I. Psychopharmacological Prescriptions in Children and Adolescents in Germany. *Dtsch Arztebl Int* **2016**, *113*, 396-403, doi:10.3238/arztebl.2016.0396.
20. Ehrhardt, C.; Boucherie, Q.; Pauly, V.; Braunstein, D.; Ronfle, E.; Thirion, X.; Frauger, E.; Micallef, J. Methylphenidate: Gender trends in adult and pediatric populations over a 7year period. *Therapie* **2017**, *72*, 635-641, doi:10.1016/j.therap.2017.05.005.
21. Fond, G.; Pauly, V.; Brousse, Y.; Llorca, P.M.; Cortese, S.; Rahmati, M.; Correll, C.U.; Gosling, C.J.; Fornaro, M.; Solmi, M.; et al. Mental Health Care Utilization and Prescription Rates Among Children, Adolescents, and Young Adults in France. *JAMA Netw Open* **2025**, *8*, e2452789, doi:10.1001/jamanetworkopen.2024.52789.
22. Stuhec, M.; Locatelli, I. Attention deficit hyperactivity disorder pharmacotherapy in Slovenian adults: a population-based study. *Int J Clin Pharm* **2018**, *40*, 341-344, doi:10.1007/s11096-018-0605-0.
23. Stuhec, M.; Locatelli, I. Age-related pharmacotherapy of attention deficit hyperactivity disorder in Slovenia in children and adolescents: A population-based study. *Eur Psychiatry* **2017**, *42*, 129-133, doi:10.1016/j.eurpsy.2017.01.002.
24. Boland, F.; Galvin, R.; Reulbach, U.; Motterlini, N.; Kelly, D.; Bennett, K.; Fahey, T. Psychostimulant prescribing trends in a paediatric population in Ireland: a national cohort study. *BMC Pediatr* **2015**, *15*, 118, doi:10.1186/s12887-015-0435-3.
25. Beau-Lejdstrom, R.; Douglas, I.; Evans, S.J.; Smeeth, L. Latest trends in ADHD drug prescribing patterns in children in the UK: prevalence, incidence and persistence. *BMJ Open* **2016**, *6*, e010508, doi:10.1136/bmjopen-2015-010508.
26. McCarthy, S.; Wilton, L.; Murray, M.L.; Hodgkins, P.; Asherson, P.; Wong, I.C. The epidemiology of pharmacologically treated attention deficit hyperactivity disorder (ADHD) in children, adolescents and adults in UK primary care. *BMC Pediatr* **2012**, *12*, 78, doi:10.1186/1471-2431-12-78.
27. McKechnie, D.G.J.; O'Nions, E.; Dunsmuir, S.; Petersen, I. Attention-deficit hyperactivity disorder diagnoses and prescriptions in UK primary care, 2000-2018: population-based cohort study. *BJPsych Open* **2023**, *9*, e121, doi:10.1192/bjo.2023.512.
28. Butt, D.A.; Stephenson, E.; Kalia, S.; Moineddin, R.; Tu, K. Patient visits and prescriptions for attention-deficit/hyperactivity disorder from 2017-2021: Impacts of COVID-19 pandemic in primary care. *PLoS One* **2023**, *18*, e0281307, doi:10.1371/journal.pone.0281307.
29. Morkem, R.; Patten, S.; Queenan, J.; Barber, D. Recent Trends in the Prescribing of ADHD Medications in Canadian Primary Care. *J Atten Disord* **2020**, *24*, 301-308, doi:10.1177/1087054717720719.
30. Brett, J.; Karanges, E.A.; Daniels, B.; Buckley, N.A.; Schneider, C.; Nassir, A.; Zoega, H.; McLachlan, A.J.; Pearson, S.A. Psychotropic medication use in Australia, 2007 to 2015: Changes in annual incidence, prevalence and treatment exposure. *Aust N Z J Psychiatry* **2017**, *51*, 990-999, doi:10.1177/0004867417721018.
31. Song, I.; Lee, M.S.; Lee, E.K.; Shin, J.Y. Patient and provider characteristics related with prescribing of ADHD medication: Nationwide health insurance claims database study in Korea. *Asia Pac Psychiatry* **2018**, *10*, doi:10.1111/appy.12289.
32. Hoshen, M.B.; Benis, A.; Keyes, K.M.; Zoega, H. Stimulant use for ADHD and relative age in class among children in Israel. *Pharmacoepidemiol Drug Saf* **2016**, *25*, 652-660, doi:10.1002/pds.3962.

33. National Board of Health and Welfare. Socialstyrelsen. National Prescribed Drug Register. Available online: [https://sdb.socialstyrelsen.se/if\\_lak/val\\_eng.aspx](https://sdb.socialstyrelsen.se/if_lak/val_eng.aspx) (accessed on 14 July 2025).
34. The Norwegian Institute of Public Health, Norhealth. Available online: [www.norgeshelsa.no](http://www.norgeshelsa.no) (accessed on 14 July 2025).
35. The Norwegian Institute of Public Health. The Norwegian Prescription Database. Available online: <https://www.norpd.no> (accessed on 14 July 2025).
36. Schmidt, M.; Hallas, J.; Laursen, M.; Friis, S. Data Resource Profile: Danish online drug use statistics (MEDSTAT). *Int J Epidemiol* **2016**, *45*, 1401-1402g, doi:10.1093/ije/dyw116.
37. Health, T.D.o. The Icelandic Pharmaceutical Database. Available online: <https://island.is/en/pharmaceutical-statistics/adhd-use-of-prescription-medicines> (accessed on 14 July 2025).
38. Welfare, A.I.o.H.a. ADHD medications dispensed 2004–05 to 2023–24. Available online: <https://www.aihw.gov.au/mental-health/topic-areas/mental-health-prescriptions/adhd-medications-dispensed-overtime> (accessed on 14 July 2025).
